# Supplementary material for: Pancreatic tumor microenvironment confers highly malignant properties on pancreatic cancer cells
Source: PubMed Central journal article supplement — Oncogene. 2018 Mar 7;37(21):2757–72. doi: 10.1038/s41388-018-0144-0 (PMC5966364; doi:10.1038/s41388-018-0144-0), 2018-03-07

SUIT-2

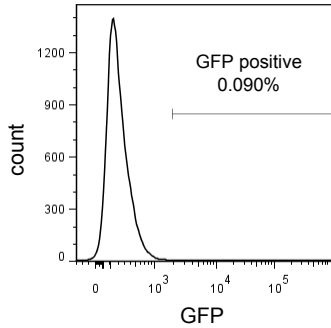

SUIT-2-parental

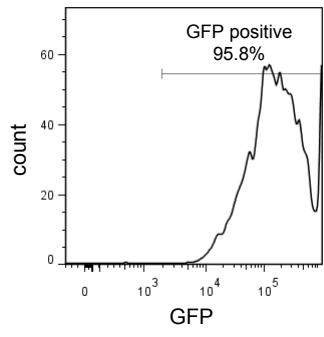

SUIT-2-3P#1

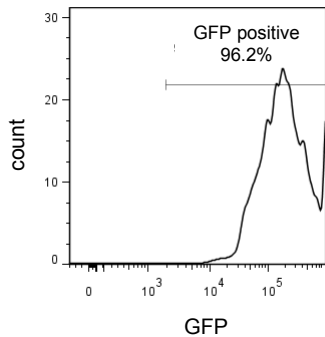

SUIT-2-3P#2

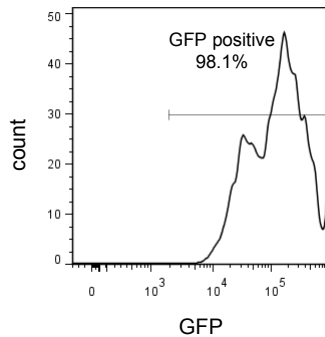

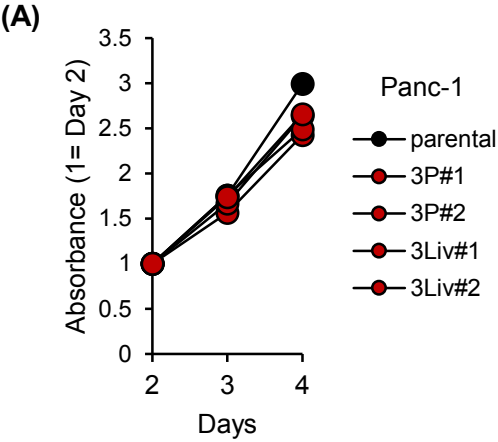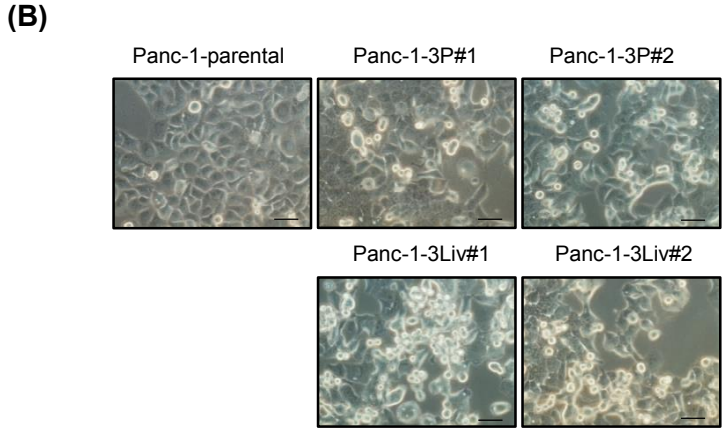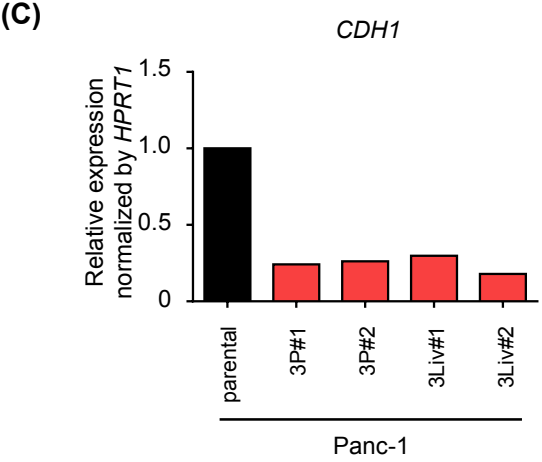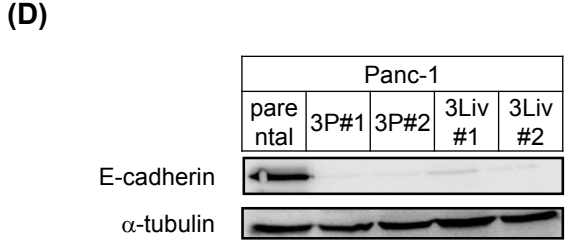

## (A) SUIT-2, FPKM

|                | parental | 3P#1   | 3P#2   | 3L#1   | 3L#2   | 3sc#1  | 3sc#2  |
|----------------|----------|--------|--------|--------|--------|--------|--------|
| <i>EPCAM</i>   | 136.05   | 66.90  | 53.03  | 66.99  | 42.29  | 71.20  | 62.61  |
| <i>PROM1</i>   | 1.70     | 0.41   | 0.58   | 0.37   | 0.67   | 0.86   | 0.40   |
| <i>CXCR4</i>   | 0.00     | 0.00   | 0.37   | 0.82   | 0.50   | 0.15   | 0.00   |
| <i>ALDH1A1</i> | 1.29     | 0.76   | 0.25   | 0.49   | 0.27   | 0.00   | 0.00   |
| <i>ALDH1A2</i> | 0.00     | 0.00   | 0.00   | 0.00   | 0.00   | 0.00   | 0.00   |
| <i>ALDH1A3</i> | 133.47   | 103.83 | 98.13  | 93.86  | 87.76  | 115.47 | 124.84 |
| <i>SOX2</i>    | 0.11     | 0.30   | 0.00   | 0.00   | 0.06   | 0.00   | 0.00   |
| <i>NANOG</i>   | 0.00     | 0.00   | 0.00   | 0.00   | 0.00   | 0.00   | 0.00   |
| <i>POU5F1</i>  | 1.08     | 1.65   | 1.45   | 1.09   | 1.60   | 4.14   | 2.54   |
| <i>CD24</i>    | 44.80    | 128.99 | 101.51 | 116.89 | 100.00 | 77.59  | 62.02  |
| <i>CD44</i>    | 129.94   | 148.27 | 161.96 | 162.37 | 157.73 | 302.03 | 179.78 |

## (B) Panc-1, FPKM

|                | parental | 3P#1   | 3P#2   | 3Liv#1 | 3Liv#2 |
|----------------|----------|--------|--------|--------|--------|
| <i>EPCAM</i>   | 8.03     | 12.80  | 12.88  | 13.63  | 23.03  |
| <i>PROM1</i>   | 0.10     | 0.00   | 0.07   | 0.04   | 0.03   |
| <i>CXCR4</i>   | 0.08     | 1.81   | 0.36   | 0.61   | 0.07   |
| <i>ALDH1A1</i> | 0.11     | 0.06   | 0.00   | 0.14   | 0.05   |
| <i>ALDH1A2</i> | 0.04     | 0.04   | 0.04   | 0.10   | 0.03   |
| <i>ALDH1A3</i> | 22.44    | 4.40   | 3.88   | 2.89   | 3.67   |
| <i>SOX2</i>    | 0.16     | 2.30   | 2.76   | 0.77   | 2.55   |
| <i>NANOG</i>   | 0.00     | 0.00   | 0.00   | 0.00   | 0.00   |
| <i>POU5F1</i>  | 0.00     | 0.09   | 0.00   | 0.00   | 0.20   |
| <i>CD24</i>    | 15.41    | 9.01   | 11.02  | 23.30  | 24.22  |
| <i>CD44</i>    | 296.73   | 319.22 | 349.49 | 525.81 | 443.76 |

## (C)

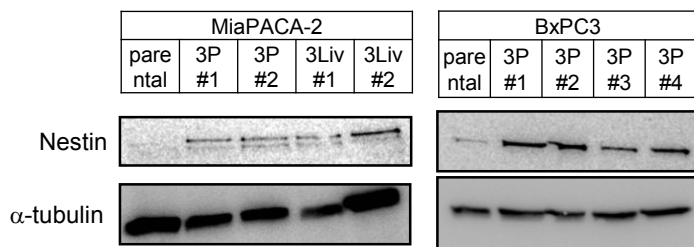

## (D)

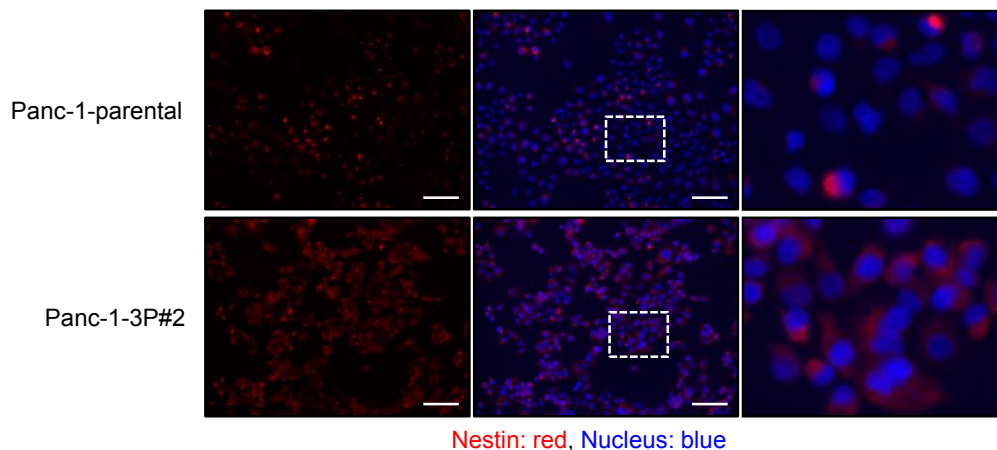

clone2

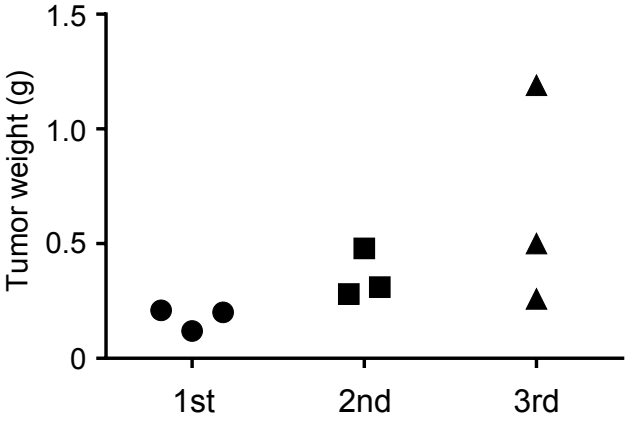

clone10

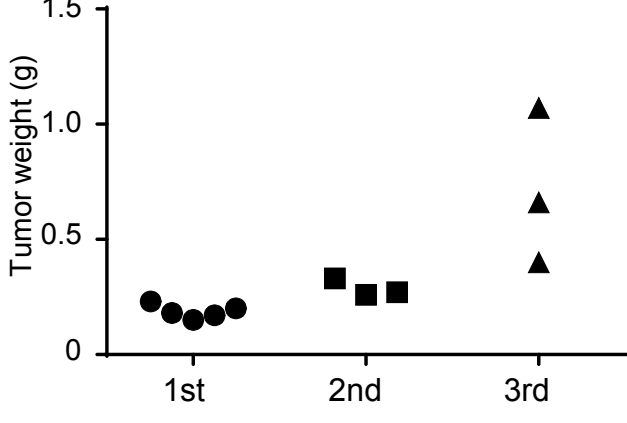

clone13

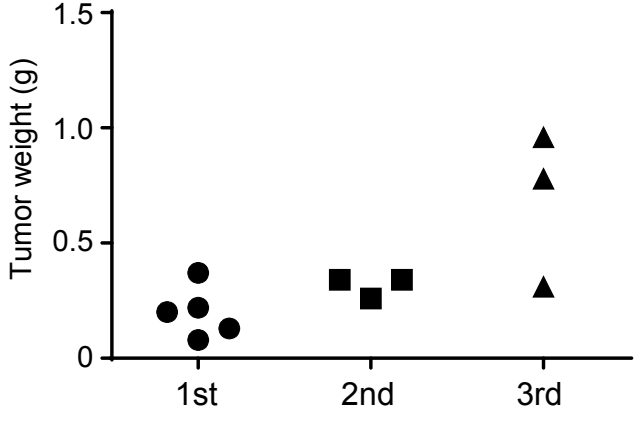

clone22

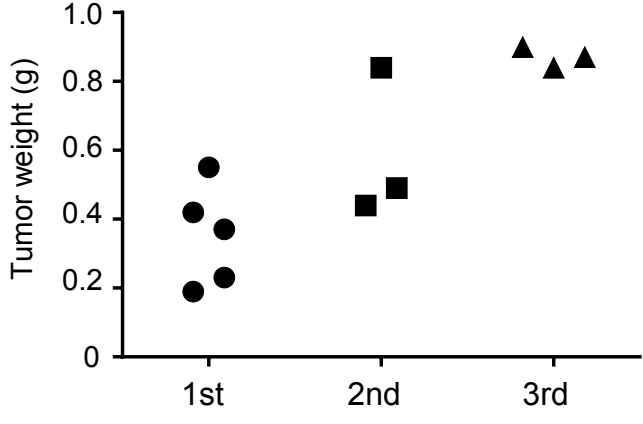

Supplement: 41388_2018_144_MOESM2_ESM.pdf [file 41388_2018_144_MOESM2_ESM.pdf]
